# Supplementary material for: Inhibitor incidence in an unselected cohort of previously untreated patients with severe hemophilia B: a PedNet study
Source: PubMed Central journal article supplement — Haematologica. 2020 Jan 9;106(1):123–9. doi: 10.3324/haematol.2019.239160 (PMC7776246; doi:10.3324/haematol.2019.239160), 2020-01-09
Supplement: 2019_239160-Disclosures_Contributions.pdf [file 2019_239160-Disclosures_Contributions.pdf]

Haematologica  
HAEMATOL/2019/239160  
Version 3

Inhibitor incidence in an unselected cohort of previously untreated patients with severe haemophilia B: a PedNet study

Christoph Male, Nadine G. Andersson, Anne Rafowicz, Ri Liesner, Karin Kurnik, Kathelijn Fischer, Helen Platokouki, Elena Santagostino, Hervé Chambost, Beatrice Nolan, Christoph Königs, Gili Kenet, Rolf Ljung, and Marijke van den Berg  
(Collaborative Groups: PedNet study group)

Disclosures: The authors declare no competing financial interests.

Contributions: C.M., A.R., R.L, K.K., K.F., H.P., E.S., H.C., B.N., C.K., G.K. were responsible for the care for HB patients with inhibitors. C.M., N.A, R.L., M.vdB analyzed the data and drafted the manuscript, all authors contributed to writing the manuscript and have approved its final version.
